# Supplementary material for: Oxidative Stress-Induced HMGB1 Translocation in Myenteric Neurons Contributes to Neuropathy in Colitis
Source: MDPI journal article supplement (doi:10.3390/biom12121831), 2022-12-07
Supplement: s1 [file s1]

## Supplementary tables

**Table S1 *HMGB1* counts in the myenteric ganglia of Winnie mice**

| <b>HMGB1 expression</b>               | <b>C57BL/6</b> | <b><i>Winnie</i></b> |
|---------------------------------------|----------------|----------------------|
| <b>HMGB1<sup>+ve</sup> cells/area</b> |                |                      |
| total                                 | 38.5±2.6       | 30.5±2.3*            |
| neurons                               | 20.1±1.1       | 11.5±1.6**           |
| non-neuronal                          | 18.4±1.8       | 19.0±1.2             |
| <b>Neurons %</b>                      |                |                      |
| HMGB1 <sup>-ve</sup>                  | 10.8±3         | 37.3±8.8*            |
| HMGB1-translocated                    | 0.5±0.3        | 10.0±4.0*            |

HMGB1 - High mobility group box-1, HMGB1<sup>+ve</sup> – HMGB1 expressed in the nucleus, HMGB1<sup>-ve</sup> – HMGB1 absent from the nucleus. \* $P < 0.05$ , \*\* $P < 0.01$  significantly different to C57BL/6. C57BL/6: n=5 mice, *Winnie*: n=7 mice.

**Table S2 *HMGB1 counts in the myenteric plexus of organotypic cultures***

| <b>HMGB1 expression</b>               | <b>Control</b> | <b>↑O<sub>2</sub></b> | <b>H<sub>2</sub>O<sub>2</sub></b> |
|---------------------------------------|----------------|-----------------------|-----------------------------------|
| <b>HMGB1<sup>+ve</sup> cells/area</b> |                |                       |                                   |
| neurons                               | 19.5±1.8       | 12.4±0.7*             | 11.5±1.9*                         |
| non-neuronal                          | 27.7±2.0       | 24.5±1.7              | 23.5±2.1                          |
| <b>HMGB1<sup>-ve</sup> cells/area</b> |                |                       |                                   |
| neurons                               | 2.7±1.3        | 6.6±2.1*              | 4.8±1.1*                          |
| <b>HMGB1-translocated cells/area</b>  |                |                       |                                   |
| neurons                               | 0.21±0.01      | 0.92±0.26*            | 0.71±0.17*                        |
| non-neuronal                          | 0.72±0.19      | 0.87±0.14             | 1.09±0.29                         |
| <b>Neurons %</b>                      |                |                       |                                   |
| HMGB1 <sup>+ve</sup>                  | 92.8±3.0       | 76.4±2.5*             | 69.0±8.3*                         |
| HMGB1 <sup>-ve</sup>                  | 7.2±3.0        | 23.6±2.5*             | 31.1±8.3*                         |
| HMGB1-translocated                    | 0.65±0.37      | 6.05±1.41**           | 3.76±0.95*                        |

↑O<sub>2</sub> – hyperoxia, H<sub>2</sub>O<sub>2</sub>, hydrogen peroxide, HMGB1 - High mobility group box-1, HMGB1<sup>+ve</sup> – HMGB1 expressed in the nucleus, HMGB1<sup>-ve</sup> – HMGB1 absent from the nucleus. \**P*<0.05, \*\**P*<0.01 significantly different to control. Control: n=8 independent samples, ↑O<sub>2</sub>: n=7 independent samples, H<sub>2</sub>O<sub>2</sub>: n=9 independent samples.

**Table S3** *Correlation between HMGB1 counts and neuronal density in hyperoxia-treated organotypic cultures*

| <b>HMGB1 expression</b>               | <b>R<sup>2</sup></b> | <b>Relationship to neuronal density</b> | <b>P value</b> |
|---------------------------------------|----------------------|-----------------------------------------|----------------|
| <b>HMGB1<sup>+ve</sup> cells/area</b> |                      |                                         |                |
| Neurons                               | 0.5874               | Increase                                | 0.0022         |
| non-neuronal                          | 0.337                | Increase                                | 0.0375         |
| <b>HMGB1<sup>-ve</sup> cells/area</b> |                      |                                         |                |
| Neurons                               | 0.4404               | Decrease                                | 0.026          |
| <b>HMGB1-translocated cells/area</b>  |                      |                                         |                |
| neurons                               | 0.5794               | Decrease                                | 0.004          |
| non-neuronal                          | 0.01006              | -                                       | 0.7444         |
| <b>Neurons %</b>                      |                      |                                         |                |
| HMGB1 <sup>-ve</sup>                  | 0.6063               | Decrease                                | 0.0047         |
| HMGB1-translocated                    | 0.6364               | Decrease                                | 0.0019         |

HMGB1 - High mobility group box-1, HMGB1<sup>+ve</sup> – HMGB1 expressed in the nucleus, HMGB1<sup>-ve</sup> – HMGB1 absent from the nucleus. Control: n=8 independent samples, ↑O<sub>2</sub>: n=7 independent samples.

**Table S4** *Correlation between HMGB1 counts and neuronal density in H<sub>2</sub>O<sub>2</sub>-treated organotypic cultures*

| <b>HMGB1 expression</b>                  | <b>R<sup>2</sup></b> | <b>Relationship<br/>to neuronal<br/>density</b> | <b>P value</b> |
|------------------------------------------|----------------------|-------------------------------------------------|----------------|
| <b>HMGB1<sup>+ve</sup> cells/area</b>    |                      |                                                 |                |
| neurons                                  | 0.6546               | Increase                                        | 0.0003         |
| non-neuronal                             | 0.1768               | -                                               | 0.1187         |
| <b>HMGB1<sup>-ve</sup> cells/area</b>    |                      |                                                 |                |
| neurons                                  | 0.5551               | Decrease                                        | 0.0022         |
| <b>HMGB1-translocated<br/>cells/area</b> |                      |                                                 |                |
| neurons                                  | 0.7457               | Decrease                                        | <0.0001        |
| non-neuronal                             | 0.054                | -                                               | 0.424          |
| <b>Neurons %</b>                         |                      |                                                 |                |
| HMGB1 <sup>-ve</sup>                     | 0.5029               | Decrease                                        | 0.0045         |
| HMGB1-translocated                       | 0.6684               | Decrease                                        | 0.0002         |

H<sub>2</sub>O<sub>2</sub>, hydrogen peroxide, HMGB1 - High mobility group box-1, HMGB1<sup>+ve</sup> – HMGB1 expressed in the nucleus, HMGB1<sup>-ve</sup> – HMGB1 absent from the nucleus. Control: n=8 independent samples, H<sub>2</sub>O<sub>2</sub>: n=9 independent samples.

**Table S5** *Effects of glycyrrhizic acid treatments on the number of leukocytes in proximity to the myenteric ganglia*

| Location                   | CD45-IR cells/area |              |              |
|----------------------------|--------------------|--------------|--------------|
|                            | C57BL/6            | Winnie-Sham  | Winnie GA    |
| <b>In ganglia</b>          | 0.6±0.2            | 3.5±0.7***   | 2.6±0.3**    |
| <b>Edge of the ganglia</b> | 4.0±0.6            | 27.1±2.1**** | 23.2±2.3**** |
| <b>Outside the ganglia</b> | 3.3±0.7            | 16.6±2.5**** | 19.3±1.3**** |
| <b>Total</b>               | 7.8±1.2            | 47.3±3.2**** | 44.9±3.6**** |

GA – glycyrrhizic acid, IR – immunoreactive. \*\* $P<0.01$ , \*\*\* $P<0.001$ , \*\*\*\* $P<0.0001$  significantly different to C57BL/6; n=6 animals/group.
